# Supplementary material for: Extent of Height Variability Explained by Known Height-Associated Genetic Variants in an Isolated Population of the Adriatic Coast of Croatia
Source: PubMed Central journal article supplement (PMC3246488; doi:10.1371/journal.pone.0029475), 2011-12-27
Supplement: pone.0029475.s006.pdf [file pone.0029475.s006.pdf]

**Supplementary Table S1.** Frequencies and effect sizes of the 180 height-associated SNPs reported by Lango Alleen et al. [*Nature* 467 (7317): 832-8]

| SNP <sup>®</sup> | Chr | Position | Gene               | A1 | A2 <sup>#</sup> | Reference study <sup>5</sup> |        |          | Our study <sup>8</sup> |        |          | P <sub>net</sub> <sup>*</sup> |
|------------------|-----|----------|--------------------|----|-----------------|------------------------------|--------|----------|------------------------|--------|----------|-------------------------------|
|                  |     |          |                    |    |                 | Freq                         | Beta   | P-value  | Freq                   | Beta   | P-value  |                               |
| rs425277         | 1   | 2059032  | <i>PRKCZ</i>       | C  | T               | 0.280                        | 0.022  | 2.10E-08 | 0.302                  | -0.030 | 5.50E-01 | 0.305                         |
| rs2284746        | 1   | 17179262 | <i>MFAP2</i>       | G  | C               | 0.480                        | -0.040 | 3.90E-29 | 0.487                  | -0.018 | 6.99E-01 | 0.628                         |
| rs1738475        | 1   | 23409478 | <i>HTR1D</i>       | C  | G               | 0.410                        | -0.025 | 3.00E-12 | 0.470                  | 0.035  | 4.58E-01 | 0.202                         |
| rs4601530        | 1   | 24916698 | <i>CLIC4</i>       | C  | T               | 0.260                        | -0.028 | 2.20E-12 | 0.294                  | 0.008  | 8.83E-01 | 0.495                         |
| rs7532866        | 1   | 26614131 | <i>LIN28</i>       | A  | G               | 0.330                        | -0.021 | 3.40E-08 | 0.398                  | -0.012 | 8.05E-01 | 0.847                         |
| rs2154319        | 1   | 41518357 | <i>SCMH1</i>       | T  | C               | 0.250                        | 0.030  | 1.80E-12 | 0.280                  | 0.044  | 3.94E-01 | 0.791                         |
| rs17391694       | 1   | 78396214 | <i>GIPC2</i>       | C  | T               | 0.120                        | 0.042  | 1.70E-11 | 0.052                  | 0.106  | 3.07E-01 | 0.537                         |
| rs6699417        | 1   | 88896031 | <i>PKN2</i>        | T  | C               | 0.390                        | -0.021 | 5.00E-09 | 0.357                  | -0.031 | 5.20E-01 | 0.841                         |
| rs10874746       | 1   | 93096559 | <i>RPL5</i>        | C  | T               | 0.370                        | -0.024 | 6.70E-11 | 0.334                  | 0.042  | 4.00E-01 | 0.185                         |
| rs9428104        | 1   | 1.19E+08 | <i>SPAG17</i>      | G  | A               | 0.240                        | -0.041 | 5.60E-23 | 0.225                  | 0.009  | 8.65E-01 | 0.352                         |
| rs11205277       | 1   | 1.48E+08 | <i>SF3B4</i>       | A  | G               | 0.420                        | 0.046  | 4.80E-32 | 0.356                  | 0.121  | 2.59E-02 | 0.168                         |
| rs17346452       | 1   | 1.7E+08  | <i>DNM3</i>        | T  | C               | 0.270                        | 0.040  | 1.40E-23 | 0.246                  | 0.063  | 2.31E-01 | 0.663                         |
| rs1325598        | 1   | 1.75E+08 | <i>PAPPA2</i>      | G  | A               | 0.430                        | -0.022 | 1.10E-09 | 0.405                  | -0.041 | 3.83E-01 | 0.684                         |
| rs1046934        | 1   | 1.82E+08 | <i>TSEN15</i>      | A  | C               | 0.360                        | 0.044  | 2.10E-31 | 0.334                  | -0.072 | 1.37E-01 | <b>0.017</b>                  |
| rs10863936       | 1   | 2.1E+08  | <i>DTL</i>         | A  | G               | 0.470                        | 0.021  | 1.90E-09 | 0.473                  | 0.028  | 5.45E-01 | 0.881                         |
| rs6684205        | 1   | 2.17E+08 | <i>TGFB2</i>       | A  | G               | 0.290                        | 0.028  | 1.50E-12 | 0.266                  | 0.133  | 1.01E-02 | <b>0.043</b>                  |
| rs11118346       | 1   | 2.18E+08 | <i>LYPLAL1</i>     | C  | T               | 0.470                        | -0.025 | 1.90E-12 | 0.449                  | -0.066 | 1.49E-01 | 0.373                         |
| rs10799445       | 1   | 2.26E+08 | <i>JMJD4</i>       | A  | C               | 0.230                        | -0.032 | 2.40E-13 | 0.241                  | -0.069 | 2.06E-01 | 0.501                         |
| rs4665736        | 2   | 25041103 | <i>DNAJC27</i>     | T  | C               | 0.460                        | -0.029 | 7.30E-16 | 0.454                  | -0.056 | 2.31E-01 | 0.562                         |
| rs6714546        | 2   | 33214929 | <i>LTBP1</i>       | G  | A               | 0.280                        | -0.026 | 1.60E-09 | 0.279                  | -0.060 | 2.62E-01 | 0.527                         |
| rs17511102       | 2   | 37814117 | <i>CDC42EP3</i>    | A  | T               | 0.090                        | 0.060  | 1.60E-18 | 0.101                  | 0.019  | 8.07E-01 | 0.597                         |
| rs2341459        | 2   | 44621706 | <i>C2orf34</i>     | C  | T               | 0.270                        | 0.025  | 7.90E-10 | 0.279                  | 0.030  | 5.63E-01 | 0.926                         |
| rs12474201       | 2   | 46774789 | <i>SOC5</i>        | G  | A               | 0.350                        | 0.028  | 2.60E-13 | 0.290                  | -0.027 | 5.84E-01 | 0.270                         |
| rs3791675        | 2   | 55964813 | <i>EFEMP1</i>      | C  | T               | 0.230                        | -0.053 | 2.50E-35 | 0.346                  | -0.147 | 2.45E-03 | 0.054                         |
| rs11684404       | 2   | 88705737 | <i>EIF2AK3</i>     | T  | C               | 0.330                        | 0.028  | 9.90E-14 | 0.297                  | -0.015 | 7.67E-01 | 0.395                         |
| rs7567288        | 2   | 1.34E+08 | <i>NCKAP5</i>      | T  | C               | 0.200                        | 0.032  | 2.10E-12 | 0.159                  | -0.006 | 9.22E-01 | 0.542                         |
| rs7567851        | 2   | 1.78E+08 | <i>PDE11A</i>      | G  | C               | 0.080                        | 0.037  | 3.30E-08 | 0.092                  | 0.088  | 2.79E-01 | 0.533                         |
| rs1351164        | 2   | 2.18E+08 | <i>TNS1</i>        | T  | C               | 0.210                        | -0.034 | 2.10E-14 | 0.227                  | 0.034  | 5.30E-01 | 0.210                         |
| rs12470505       | 2   | 2.2E+08  | <i>CCDC108/IHH</i> | T  | G               | 0.100                        | -0.041 | 8.90E-12 | 0.100                  | -0.107 | 1.64E-01 | 0.392                         |
| rs2629046        | 2   | 2.25E+08 | <i>SERPINE2</i>    | T  | C               | 0.450                        | -0.024 | 7.90E-12 | 0.445                  | 0.038  | 4.08E-01 | 0.178                         |
| rs2580816        | 2   | 2.33E+08 | <i>NPPC</i>        | C  | T               | 0.190                        | -0.045 | 5.80E-22 | 0.199                  | -0.089 | 1.19E-01 | 0.440                         |
| rs12694997       | 2   | 2.42E+08 | <i>SEPT2</i>       | G  | A               | 0.240                        | -0.024 | 1.20E-08 | 0.288                  | -0.087 | 8.42E-02 | 0.212                         |
| rs2597513        | 3   | 13530836 | <i>HDAC11</i>      | T  | C               | 0.100                        | 0.036  | 7.40E-10 | 0.100                  | 0.039  | 6.19E-01 | 0.971                         |
| rs13088462       | 3   | 51046753 | <i>DOCK3</i>       | T  | C               | 0.060                        | 0.052  | 3.80E-10 | 0.098                  | 0.158  | 3.78E-02 | 0.165                         |
| rs2336725        | 3   | 53093779 | <i>RTF1</i>        | T  | C               | 0.450                        | 0.027  | 9.70E-13 | 0.409                  | 0.076  | 1.05E-01 | 0.297                         |
| rs9835332        | 3   | 56642722 | <i>C3orf63</i>     | G  | C               | 0.460                        | -0.026 | 5.30E-13 | 0.386                  | -0.115 | 1.32E-02 | 0.056                         |
| rs17806888       | 3   | 67499012 | <i>SUCLG2</i>      | T  | C               | 0.120                        | -0.036 | 2.10E-09 | 0.168                  | -0.002 | 9.75E-01 | 0.589                         |
| rs9863706        | 3   | 72520103 | <i>RYBP</i>        | C  | T               | 0.220                        | -0.031 | 4.10E-13 | 0.185                  | -0.078 | 1.99E-01 | 0.440                         |
| rs6439167        | 3   | 1.31E+08 | <i>C3orf47</i>     | C  | T               | 0.210                        | -0.034 | 8.90E-15 | 0.203                  | 0.013  | 8.24E-01 | 0.415                         |
| rs9844666        | 3   | 1.37E+08 | <i>PCCB</i>        | G  | A               | 0.250                        | -0.024 | 3.50E-09 | 0.214                  | 0.045  | 4.17E-01 | 0.215                         |
| rs724016         | 3   | 1.43E+08 | <i>ZBTB38</i>      | A  | G               | 0.440                        | 0.070  | 3.10E-86 | 0.323                  | 0.088  | 6.50E-02 | 0.711                         |
| rs572169         | 3   | 1.74E+08 | <i>GHSR</i>        | C  | T               | 0.310                        | 0.033  | 2.80E-18 | 0.311                  | 0.039  | 4.26E-01 | 0.898                         |
| rs720390         | 3   | 1.87E+08 | <i>IGF2BP2</i>     | G  | A               | 0.390                        | 0.029  | 1.90E-14 | 0.320                  | -0.030 | 5.54E-01 | 0.242                         |
| rs2247341        | 4   | 1671115  | <i>SLBP/FGFR3</i>  | G  | A               | 0.360                        | 0.025  | 1.50E-11 | 0.293                  | 0.069  | 1.71E-01 | 0.385                         |
| rs6449353        | 4   | 17642586 | <i>LCORL</i>       | T  | C               | 0.150                        | -0.075 | 7.10E-46 | 0.167                  | -0.016 | 7.94E-01 | 0.346                         |
| rs17081935       | 4   | 57518233 | <i>POLR2B</i>      | C  | T               | 0.200                        | 0.030  | 3.70E-11 | 0.229                  | 0.030  | 6.01E-01 | 0.995                         |
| rs7697556        | 4   | 73734177 | <i>ADAMTS3</i>     | C  | T               | 0.470                        | 0.028  | 2.00E-14 | 0.431                  | -0.014 | 7.63E-01 | 0.366                         |
| rs788867         | 4   | 82369030 | <i>PRKG2/BMP3</i>  | T  | G               | 0.320                        | 0.043  | 8.90E-28 | 0.377                  | 0.102  | 3.02E-02 | 0.211                         |

|            |   |          |                        |   |   |       |        |          |       |        |          |              |
|------------|---|----------|------------------------|---|---|-------|--------|----------|-------|--------|----------|--------------|
| rs10010325 | 4 | 1.06E+08 | <i>TET2</i>            | A | C | 0.510 | -0.024 | 3.90E-11 | 0.478 | 0.055  | 2.36E-01 | 0.089        |
| rs7689420  | 4 | 1.46E+08 | <i>HHIP</i>            | C | T | 0.160 | -0.073 | 6.20E-51 | 0.159 | -0.065 | 2.90E-01 | 0.902        |
| rs955748   | 4 | 1.84E+08 | <i>WWC2</i>            | G | A | 0.240 | -0.023 | 4.40E-08 | 0.205 | 0.052  | 3.61E-01 | 0.188        |
| rs1173727  | 5 | 32866278 | <i>NPR3</i>            | C | T | 0.400 | 0.034  | 1.60E-21 | 0.469 | 0.007  | 8.75E-01 | 0.555        |
| rs11958779 | 5 | 55037656 | <i>SLC38A9</i>         | A | G | 0.300 | 0.027  | 1.80E-12 | 0.259 | 0.050  | 3.48E-01 | 0.663        |
| rs10037512 | 5 | 88390431 | <i>MEF2C</i>           | T | C | 0.440 | -0.032 | 2.00E-18 | 0.338 | -0.050 | 3.06E-01 | 0.709        |
| rs13177718 | 5 | 1.08E+08 | <i>FER</i>             | C | T | 0.070 | -0.040 | 3.00E-08 | 0.031 | -0.082 | 5.36E-01 | 0.751        |
| rs1582931  | 5 | 1.23E+08 | <i>CEP120</i>          | A | G | 0.530 | 0.023  | 1.50E-10 | 0.422 | 0.039  | 4.11E-01 | 0.732        |
| rs274546   | 5 | 1.32E+08 | <i>SLC22A5</i>         | G | A | 0.400 | -0.029 | 7.30E-16 | 0.452 | 0.032  | 4.98E-01 | 0.197        |
| rs526896   | 5 | 1.34E+08 | <i>PITX1</i>           | T | G | 0.270 | -0.030 | 2.30E-13 | 0.295 | -0.031 | 5.42E-01 | 0.985        |
| rs4282339  | 5 | 1.68E+08 | <i>SLIT3</i>           | G | A | 0.200 | -0.036 | 6.60E-16 | 0.229 | -0.016 | 7.67E-01 | 0.717        |
| rs12153391 | 5 | 1.71E+08 | <i>FBXW11</i>          | C | A | 0.250 | -0.030 | 3.60E-12 | 0.234 | -0.087 | 1.22E-01 | 0.313        |
| rs889014   | 5 | 1.73E+08 | <i>BOD1</i>            | C | T | 0.360 | -0.030 | 9.40E-16 | 0.415 | -0.070 | 1.38E-01 | 0.399        |
| rs422421   | 5 | 1.76E+08 | <i>FGFR4/NSD1</i>      | C | T | 0.220 | -0.031 | 1.10E-12 | 0.244 | 0.004  | 9.40E-01 | 0.511        |
| rs6879260  | 5 | 1.8E+08  | <i>GFPT2</i>           | C | T | 0.390 | -0.022 | 1.60E-09 | 0.392 | -0.022 | 6.27E-01 | 0.992        |
| rs3812163  | 6 | 7670759  | <i>BMP6</i>            | A | T | 0.460 | 0.036  | 1.20E-23 | 0.460 | 0.038  | 4.07E-01 | 0.969        |
| rs1047014  | 6 | 19949472 | <i>ID4</i>             | T | C | 0.250 | 0.032  | 1.80E-13 | 0.231 | 0.032  | 5.52E-01 | 0.996        |
| rs806794   | 6 | 26308656 | <i>Histone cluster</i> | A | G | 0.300 | -0.052 | 1.20E-39 | 0.238 | -0.125 | 1.99E-02 | 0.175        |
| rs3129109  | 6 | 29192211 | <i>OR2J3</i>           | C | T | 0.390 | -0.032 | 2.40E-17 | 0.371 | -0.022 | 6.47E-01 | 0.836        |
| rs2256183  | 6 | 31488508 | <i>MICA</i>            | G | A | 0.450 | 0.040  | 7.80E-29 | 0.360 | 0.086  | 7.40E-02 | 0.338        |
| rs6457620  | 6 | 32771977 | <i>HLA locus</i>       | C | G | 0.490 | 0.029  | 2.10E-16 | 0.405 | 0.026  | 5.78E-01 | 0.958        |
| rs2780226  | 6 | 34307070 | <i>HMGA1</i>           | T | C | 0.080 | 0.076  | 8.10E-28 | 0.039 | -0.018 | 8.83E-01 | 0.434        |
| rs6457821  | 6 | 35510783 | <i>PPARD/FANCE</i>     | C | A | 0.020 | -0.104 | 2.10E-12 | 0.004 | 0.303  | 4.18E-01 | 0.276        |
| rs9472414  | 6 | 45054484 | <i>SUPT3H/RUNX2</i>    | T | A | 0.220 | -0.026 | 1.80E-09 | 0.253 | -0.037 | 4.88E-01 | 0.839        |
| rs9360921  | 6 | 76322362 | <i>SENP6</i>           | T | G | 0.110 | 0.042  | 2.60E-13 | 0.107 | -0.013 | 8.64E-01 | 0.472        |
| rs310405   | 6 | 81857081 | <i>FAM46A</i>          | A | G | 0.480 | -0.026 | 2.20E-13 | 0.410 | 0.015  | 7.47E-01 | 0.378        |
| rs7759938  | 6 | 1.05E+08 | <i>LIN28B</i>          | T | C | 0.320 | 0.045  | 8.30E-31 | 0.341 | -0.004 | 9.29E-01 | 0.298        |
| rs1046943  | 6 | 1.1E+08  | <i>ZBTB24</i>          | A | G | 0.420 | -0.020 | 2.50E-08 | 0.395 | -0.038 | 4.23E-01 | 0.702        |
| rs961764   | 6 | 1.18E+08 | <i>VGLL2</i>           | G | C | 0.420 | -0.024 | 1.30E-11 | 0.426 | -0.043 | 3.57E-01 | 0.688        |
| rs1490384  | 6 | 1.27E+08 | <i>C6orf173</i>        | T | C | 0.500 | -0.034 | 3.90E-21 | 0.469 | -0.059 | 1.91E-01 | 0.578        |
| rs6569648  | 6 | 1.3E+08  | <i>L3MBTL3</i>         | T | C | 0.240 | 0.040  | 1.10E-21 | 0.218 | 0.101  | 6.35E-02 | 0.263        |
| rs7763064  | 6 | 1.43E+08 | <i>GPR126</i>          | G | A | 0.290 | -0.048 | 1.10E-33 | 0.320 | -0.129 | 9.98E-03 | 0.106        |
| rs543650   | 6 | 1.52E+08 | <i>ESR1</i>            | G | T | 0.400 | -0.034 | 1.20E-17 | 0.396 | -0.055 | 3.38E-01 | 0.718        |
| rs9456307  | 6 | 1.59E+08 | <i>TULP4</i>           | T | A | 0.060 | -0.048 | 2.20E-09 | 0.040 | -0.018 | 8.76E-01 | 0.797        |
| rs798489   | 7 | 2768329  | <i>GNA12</i>           | C | T | 0.300 | -0.048 | 1.90E-33 | 0.234 | -0.087 | 1.04E-01 | 0.471        |
| rs4470914  | 7 | 19583047 | <i>TWISTNB</i>         | C | T | 0.180 | 0.029  | 9.20E-10 | 0.162 | -0.040 | 5.20E-01 | 0.271        |
| rs12534093 | 7 | 23469499 | <i>IGF2BP3</i>         | T | A | 0.220 | -0.034 | 2.00E-14 | 0.175 | -0.067 | 2.67E-01 | 0.587        |
| rs1708299  | 7 | 28156471 | <i>JAZF1</i>           | G | A | 0.300 | 0.040  | 5.80E-25 | 0.259 | -0.015 | 7.76E-01 | 0.288        |
| rs6959212  | 7 | 38094851 | <i>STARD3NL</i>        | C | T | 0.320 | -0.024 | 1.60E-09 | 0.303 | -0.010 | 8.50E-01 | 0.785        |
| rs42235    | 7 | 92086012 | <i>CDK6</i>            | C | T | 0.310 | 0.057  | 7.70E-47 | 0.365 | 0.069  | 1.47E-01 | 0.795        |
| rs822552   | 7 | 1.48E+08 | <i>PDIA4</i>           | C | G | 0.260 | 0.025  | 2.60E-08 | 0.110 | 0.020  | 7.89E-01 | 0.949        |
| rs2110001  | 7 | 1.5E+08  | <i>TMEM176A</i>        | C | G | 0.310 | 0.031  | 3.30E-13 | 0.336 | 0.106  | 3.13E-02 | 0.129        |
| rs1013209  | 8 | 24172249 | <i>ADAM28</i>          | C | T | 0.250 | -0.025 | 1.60E-09 | 0.210 | 0.065  | 2.62E-01 | 0.122        |
| rs7460090  | 8 | 57356717 | <i>SDR16C5</i>         | T | C | 0.130 | -0.058 | 8.20E-27 | 0.137 | -0.014 | 8.33E-01 | 0.516        |
| rs6473015  | 8 | 78341040 | <i>PEX2</i>            | A | C | 0.280 | 0.029  | 6.90E-13 | 0.326 | 0.033  | 5.03E-01 | 0.935        |
| rs6470764  | 8 | 1.31E+08 | <i>GSDMC</i>           | C | T | 0.200 | -0.050 | 1.70E-28 | 0.174 | -0.029 | 6.27E-01 | 0.722        |
| rs12680655 | 8 | 1.36E+08 | <i>ZFAT</i>            | C | G | 0.400 | -0.028 | 1.60E-14 | 0.394 | -0.028 | 5.55E-01 | 1.000        |
| rs7864648  | 9 | 16358732 | <i>BNC2</i>            | G | T | 0.320 | 0.022  | 2.10E-08 | 0.287 | 0.019  | 7.07E-01 | 0.955        |
| rs11144688 | 9 | 77732106 | <i>PCSK5</i>           | G | A | 0.110 | -0.049 | 9.60E-12 | 0.158 | 0.000  | 9.96E-01 | 0.430        |
| rs7853377  | 9 | 85742025 | <i>C9orf64</i>         | A | G | 0.230 | 0.024  | 4.50E-08 | 0.268 | 0.026  | 6.16E-01 | 0.968        |
| rs8181166  | 9 | 88306448 | <i>ZCCHC6</i>          | C | G | 0.470 | -0.026 | 2.70E-12 | 0.493 | 0.017  | 7.04E-01 | 0.341        |
| rs2778031  | 9 | 90025546 | <i>SPIN1</i>           | C | T | 0.240 | 0.031  | 9.00E-13 | 0.252 | 0.011  | 8.30E-01 | 0.710        |
| rs9969804  | 9 | 94468941 | <i>IPPK</i>            | C | A | 0.440 | 0.030  | 7.70E-17 | 0.408 | 0.036  | 4.39E-01 | 0.903        |
| rs1257763  | 9 | 95933766 | <i>PTPDC1</i>          | G | A | 0.040 | 0.069  | 9.90E-10 | 0.050 | 0.299  | 3.92E-03 | <b>0.027</b> |

|            |    |          |                       |   |   |       |        |          |       |        |          |              |
|------------|----|----------|-----------------------|---|---|-------|--------|----------|-------|--------|----------|--------------|
| rs473902   | 9  | 97296056 | <i>PTCH1/FANCC</i>    | T | G | 0.080 | -0.065 | 2.30E-17 | 0.069 | 0.040  | 6.61E-01 | 0.253        |
| rs7027110  | 9  | 1.09E+08 | <i>ZNF462</i>         | G | A | 0.230 | 0.031  | 2.30E-13 | 0.159 | -0.089 | 1.54E-01 | 0.055        |
| rs1468758  | 9  | 1.13E+08 | <i>LPAR1</i>          | C | T | 0.250 | -0.026 | 1.40E-09 | 0.272 | 0.032  | 5.38E-01 | 0.265        |
| rs751543   | 9  | 1.18E+08 | <i>PAPPA</i>          | T | C | 0.280 | -0.026 | 6.50E-10 | 0.316 | -0.060 | 2.16E-01 | 0.484        |
| rs7466269  | 9  | 1.32E+08 | <i>FUBP3</i>          | A | G | 0.360 | -0.032 | 2.60E-17 | 0.335 | -0.008 | 8.75E-01 | 0.622        |
| rs7849585  | 9  | 1.38E+08 | <i>QSOX2</i>          | G | T | 0.330 | 0.029  | 4.70E-14 | 0.279 | -0.035 | 4.77E-01 | 0.196        |
| rs7909670  | 10 | 12958770 | <i>CCDC3</i>          | C | T | 0.440 | -0.021 | 3.20E-09 | 0.456 | -0.031 | 5.05E-01 | 0.826        |
| rs2145998  | 10 | 80791702 | <i>PPIF</i>           | A | T | 0.510 | 0.026  | 3.60E-13 | 0.435 | 0.013  | 7.74E-01 | 0.781        |
| rs11599750 | 10 | 1.02E+08 | <i>CPN1</i>           | C | T | 0.380 | -0.028 | 1.60E-13 | 0.357 | 0.010  | 8.36E-01 | 0.421        |
| rs2237886  | 11 | 2767307  | <i>KCNQ1</i>          | C | T | 0.110 | 0.046  | 2.20E-13 | 0.077 | -0.014 | 8.69E-01 | 0.489        |
| rs7926971  | 11 | 12654616 | <i>TEAD1</i>          | A | G | 0.450 | 0.023  | 4.40E-10 | 0.393 | -0.078 | 1.06E-01 | <b>0.037</b> |
| rs1330     | 11 | 17272605 | <i>NUCB2</i>          | C | T | 0.350 | 0.022  | 4.90E-09 | 0.230 | -0.056 | 3.04E-01 | 0.153        |
| rs10838801 | 11 | 48054856 | <i>PTPRJ/SLC39A13</i> | A | G | 0.310 | 0.027  | 3.50E-12 | 0.288 | 0.008  | 8.77E-01 | 0.713        |
| rs1814175  | 11 | 49515748 | <i>FOLH1</i>          | C | T | 0.340 | 0.022  | 1.60E-08 | 0.265 | -0.067 | 2.05E-01 | 0.094        |
| rs5017948  | 11 | 51270794 | <i>OR4A5</i>          | T | A | 0.180 | 0.027  | 3.10E-08 | 0.165 | -0.020 | 7.48E-01 | 0.452        |
| rs3782089  | 11 | 65093395 | <i>SSSCA1</i>         | C | T | 0.060 | -0.058 | 3.60E-13 | 0.029 | -0.033 | 8.13E-01 | 0.857        |
| rs7112925  | 11 | 66582736 | <i>RHOD</i>           | C | T | 0.350 | -0.023 | 9.00E-10 | 0.404 | 0.000  | 9.96E-01 | 0.638        |
| rs634552   | 11 | 74959700 | <i>SERPINH1</i>       | G | T | 0.140 | 0.039  | 3.50E-13 | 0.137 | 0.057  | 4.13E-01 | 0.798        |
| rs494459   | 11 | 1.18E+08 | <i>TREH</i>           | C | T | 0.410 | 0.020  | 1.70E-08 | 0.439 | -0.042 | 3.58E-01 | 0.176        |
| rs654723   | 11 | 1.28E+08 | <i>FLI1</i>           | A | C | 0.380 | -0.025 | 3.60E-11 | 0.355 | 0.080  | 9.21E-02 | <b>0.027</b> |
| rs2856321  | 12 | 11747040 | <i>ETV6</i>           | A | G | 0.360 | 0.029  | 4.50E-15 | 0.366 | 0.012  | 8.05E-01 | 0.725        |
| rs10770705 | 12 | 20748734 | <i>SLCO1C1</i>        | C | A | 0.330 | 0.033  | 8.00E-18 | 0.282 | 0.087  | 9.54E-02 | 0.302        |
| rs2638953  | 12 | 28425682 | <i>CCDC91</i>         | C | G | 0.320 | -0.032 | 6.70E-17 | 0.269 | -0.043 | 4.19E-01 | 0.836        |
| rs2066807  | 12 | 55026949 | <i>STAT2</i>          | C | G | 0.070 | 0.054  | 1.00E-13 | 0.092 | -0.067 | 3.97E-01 | 0.127        |
| rs1351394  | 12 | 64638093 | <i>HMGA2</i>          | C | T | 0.490 | 0.060  | 1.70E-65 | 0.479 | 0.171  | 1.60E-04 | <b>0.015</b> |
| rs10748128 | 12 | 68113925 | <i>FRS2</i>           | G | T | 0.350 | 0.038  | 2.10E-20 | 0.287 | -0.057 | 2.57E-01 | 0.060        |
| rs11107116 | 12 | 92502635 | <i>SOCS2</i>          | G | T | 0.220 | 0.052  | 1.40E-34 | 0.228 | 0.095  | 7.97E-02 | 0.428        |
| rs7971536  | 12 | 1.01E+08 | <i>CCDC53/GNPTAB</i>  | T | A | 0.460 | -0.028 | 8.20E-14 | 0.444 | -0.015 | 7.48E-01 | 0.774        |
| rs11830103 | 12 | 1.22E+08 | <i>SBNO1</i>          | A | G | 0.220 | 0.035  | 3.90E-15 | 0.201 | -0.033 | 5.66E-01 | 0.238        |
| rs7332115  | 13 | 32045548 | <i>PDS5B/BRCA2</i>    | T | G | 0.380 | 0.023  | 5.50E-10 | 0.385 | 0.064  | 1.68E-01 | 0.378        |
| rs3118905  | 13 | 50003335 | <i>DLEU7</i>          | G | A | 0.290 | -0.056 | 1.10E-45 | 0.311 | 0.093  | 6.32E-02 | <b>0.003</b> |
| rs7319045  | 13 | 90822575 | <i>GPC5</i>           | G | A | 0.400 | 0.025  | 1.20E-11 | 0.370 | -0.015 | 7.47E-01 | 0.395        |
| rs1950500  | 14 | 23900690 | <i>NFATC4</i>         | C | T | 0.290 | 0.034  | 2.20E-18 | 0.238 | 0.011  | 8.39E-01 | 0.673        |
| rs2093210  | 14 | 60027032 | <i>SIX6</i>           | T | C | 0.420 | 0.032  | 6.20E-17 | 0.388 | 0.030  | 5.30E-01 | 0.958        |
| rs1570106  | 14 | 67882868 | <i>RAD51L1</i>        | C | T | 0.200 | -0.026 | 8.10E-09 | 0.210 | 0.008  | 8.89E-01 | 0.554        |
| rs862034   | 14 | 74060499 | <i>LTBP2</i>          | G | A | 0.360 | -0.028 | 7.30E-14 | 0.400 | -0.040 | 3.87E-01 | 0.794        |
| rs7155279  | 14 | 91555634 | <i>TRIP11</i>         | G | T | 0.360 | -0.024 | 1.40E-10 | 0.330 | -0.035 | 4.57E-01 | 0.814        |
| rs16964211 | 15 | 49317787 | <i>CYP19A1</i>        | G | A | 0.050 | -0.050 | 1.70E-09 | 0.117 | -0.016 | 8.29E-01 | 0.637        |
| rs7178424  | 15 | 60167551 | <i>C2CD4A</i>         | C | T | 0.470 | -0.021 | 5.60E-09 | 0.382 | 0.029  | 5.40E-01 | 0.293        |
| rs10152591 | 15 | 67835211 | <i>TLE3</i>           | A | C | 0.090 | -0.041 | 2.70E-10 | 0.117 | 0.026  | 7.19E-01 | 0.356        |
| rs12902421 | 15 | 69948457 | <i>MYO9A</i>          | T | C | 0.030 | 0.062  | 2.90E-08 | 0.020 | 0.164  | 3.21E-01 | 0.538        |
| rs5742915  | 15 | 72123686 | <i>PML</i>            | C | T | 0.540 | -0.031 | 1.00E-15 | 0.386 | -0.187 | 3.42E-04 | <b>0.003</b> |
| rs11259936 | 15 | 82371586 | <i>ADAMTSL3</i>       | C | A | 0.480 | -0.044 | 1.70E-35 | 0.452 | -0.081 | 8.50E-02 | 0.430        |
| rs16942341 | 15 | 87189909 | <i>ACAN</i>           | C | T | 0.030 | -0.130 | 3.80E-27 | 0.015 | -0.355 | 6.65E-02 | 0.245        |
| rs2871865  | 15 | 97012419 | <i>IGF1R</i>          | C | G | 0.120 | -0.057 | 2.90E-21 | 0.085 | -0.145 | 6.85E-02 | 0.271        |
| rs4965598  | 15 | 98577137 | <i>ADAMTSL17</i>      | T | C | 0.320 | 0.028  | 4.30E-13 | 0.315 | 0.045  | 3.42E-01 | 0.720        |
| rs11648796 | 16 | 732191   | <i>NARFL</i>          | A | G | 0.260 | 0.034  | 1.20E-13 | 0.247 | 0.039  | 4.75E-01 | 0.934        |
| rs26868    | 16 | 2189377  | <i>CASKIN1</i>        | A | T | 0.540 | -0.034 | 9.00E-17 | 0.452 | -0.112 | 2.95E-02 | 0.131        |
| rs1659127  | 16 | 14295806 | <i>MKL2</i>           | G | A | 0.340 | 0.027  | 1.10E-11 | 0.382 | 0.029  | 5.40E-01 | 0.964        |
| rs8052560  | 16 | 87304743 | <i>CTU2/GALNS</i>     | A | C | 0.210 | -0.029 | 3.30E-08 | 0.185 | -0.053 | 3.82E-01 | 0.691        |
| rs4640244  | 17 | 21224816 | <i>KCNJ12</i>         | A | G | 0.390 | -0.024 | 2.30E-08 | 0.319 | 0.115  | 3.67E-02 | <b>0.012</b> |
| rs3110496  | 17 | 24941897 | <i>ANKRD13B</i>       | G | A | 0.330 | -0.022 | 7.30E-09 | 0.345 | -0.042 | 3.98E-01 | 0.690        |
| rs3764419  | 17 | 26188149 | <i>ATAD5/RNF135</i>   | C | A | 0.390 | -0.035 | 1.80E-21 | 0.433 | -0.088 | 6.12E-02 | 0.262        |
| rs17780086 | 17 | 27367395 | <i>LRRC37B</i>        | G | A | 0.150 | 0.028  | 2.60E-08 | 0.149 | 0.007  | 9.15E-01 | 0.748        |

|            |    |          |                     |   |   |       |        |          |       |        |          |              |
|------------|----|----------|---------------------|---|---|-------|--------|----------|-------|--------|----------|--------------|
| rs1043515  | 17 | 34175722 | <i>PIP4K2B</i>      | G | A | 0.450 | -0.023 | 2.90E-10 | 0.365 | 0.009  | 8.50E-01 | 0.502        |
| rs4986172  | 17 | 40571807 | <i>ACBD4</i>        | C | T | 0.350 | -0.032 | 2.30E-16 | 0.294 | 0.090  | 7.47E-02 | <b>0.016</b> |
| rs2072153  | 17 | 44745013 | <i>ZNF652</i>       | G | C | 0.300 | 0.021  | 3.50E-08 | 0.264 | -0.007 | 8.99E-01 | 0.601        |
| rs4605213  | 17 | 46599746 | <i>NME2</i>         | G | C | 0.340 | 0.021  | 2.70E-08 | 0.338 | 0.010  | 8.44E-01 | 0.815        |
| rs227724   | 17 | 52133816 | <i>NOG</i>          | A | T | 0.350 | 0.030  | 7.40E-15 | 0.286 | -0.024 | 6.27E-01 | 0.276        |
| rs2079795  | 17 | 56851431 | <i>TBX2</i>         | C | T | 0.330 | 0.040  | 2.10E-24 | 0.308 | 0.035  | 4.67E-01 | 0.925        |
| rs2665838  | 17 | 59320197 | <i>CSH1/GH1</i>     | C | G | 0.270 | 0.042  | 5.10E-25 | 0.305 | 0.051  | 3.18E-01 | 0.861        |
| rs11867479 | 17 | 65601802 | <i>KCNJ16/KCNJ2</i> | C | T | 0.340 | 0.025  | 1.50E-10 | 0.292 | -0.017 | 7.43E-01 | 0.418        |
| rs4800452  | 18 | 18981609 | <i>CABLES1</i>      | T | C | 0.210 | -0.051 | 4.20E-30 | 0.152 | -0.138 | 2.94E-02 | 0.171        |
| rs9967417  | 18 | 45213498 | <i>DYM</i>          | C | G | 0.420 | 0.038  | 9.30E-25 | 0.380 | -0.010 | 8.31E-01 | 0.315        |
| rs17782313 | 18 | 56002077 | <i>MC4R</i>         | T | C | 0.240 | 0.028  | 3.80E-11 | 0.228 | 0.069  | 1.96E-01 | 0.443        |
| rs12982744 | 19 | 2128193  | <i>DOT1L</i>        | C | G | 0.400 | 0.030  | 3.40E-16 | 0.392 | 0.009  | 8.55E-01 | 0.662        |
| rs7507204  | 19 | 3379834  | <i>NFIC</i>         | G | C | 0.240 | 0.036  | 4.30E-16 | 0.172 | 0.045  | 4.59E-01 | 0.883        |
| rs891088   | 19 | 7135762  | <i>INSR</i>         | A | G | 0.260 | 0.029  | 2.40E-12 | 0.248 | 0.098  | 7.25E-02 | 0.208        |
| rs4072910  | 19 | 8550031  | <i>ADAMTS10</i>     | G | C | 0.460 | -0.031 | 3.60E-13 | 0.384 | -0.041 | 5.55E-01 | 0.885        |
| rs2279008  | 19 | 17144303 | <i>MYO9B</i>        | T | C | 0.260 | -0.025 | 2.50E-08 | 0.229 | -0.146 | 1.57E-02 | <b>0.046</b> |
| rs17318596 | 19 | 46628935 | <i>ATP5SL</i>       | G | A | 0.360 | 0.032  | 5.00E-16 | 0.375 | 0.113  | 2.47E-02 | 0.109        |
| rs1741344  | 20 | 4049800  | <i>SMOX</i>         | T | C | 0.370 | 0.023  | 3.30E-09 | 0.395 | 0.082  | 7.56E-02 | 0.203        |
| rs2145272  | 20 | 6574218  | <i>BMP2</i>         | A | G | 0.350 | 0.039  | 2.10E-24 | 0.346 | 0.074  | 1.26E-01 | 0.471        |
| rs7274811  | 20 | 31796842 | <i>ZNF341</i>       | G | T | 0.230 | -0.041 | 5.90E-22 | 0.261 | 0.027  | 6.09E-01 | 0.196        |
| rs143384   | 20 | 33489170 | <i>GDF5</i>         | A | G | 0.420 | 0.063  | 1.00E-58 | 0.380 | 0.161  | 8.09E-04 | <b>0.042</b> |
| rs237743   | 20 | 47336426 | <i>ZNF1</i>         | G | A | 0.210 | 0.041  | 1.30E-20 | 0.168 | 0.141  | 2.15E-02 | 0.104        |
| rs2834442  | 21 | 34612656 | <i>KCNE2</i>        | A | T | 0.350 | -0.026 | 5.10E-12 | 0.299 | -0.037 | 4.67E-01 | 0.832        |
| rs4821083  | 22 | 31386341 | <i>SYN3</i>         | T | C | 0.160 | -0.031 | 3.10E-10 | 0.166 | 0.013  | 8.36E-01 | 0.479        |

@ The 180 height-associated SNPs and their chromosome positions and gene annotations were obtained from Supplementary Table 1 of Lango Allemen et al. [*Nature* 467 (7317): 832-8]

# The major (**A1**) and the minor (**A2**) alleles were determined based on the observed allele frequencies in our study samples. The minor alleles (**A2**) were selected as reference alleles.

§ The effect sizes and p-values of the reference study were extracted from the column [STAGE 1+ STAGE 2] of Supplementary Table 1 of Lango Allemen et al. The direction of effects and the allele frequencies were reversed if our reference alleles (**A2**) are different from the original table.

& The effect sizes were estimated from our study samples ( $N=1304$ ) and the p-values were genomic control (GC) adjusted 1df p-values by an inflation factor ( $\lambda=1.41$ ).

\* The heterogeneity of effect sizes between the reference study and our study was tested using z-test. P-values reaching nominal significance ( $P_{\text{het}} < 0.05$ ) were highlighted in italic.
